# Supplementary material for: 构建新时期＂村改居＂社会保障体系
Source: Springer Nature journal article supplement (doi:10.1186/s12885-018-4676-z), 2006-01-01
Supplement: MOESM3 [file 15984816]

A. Insulin

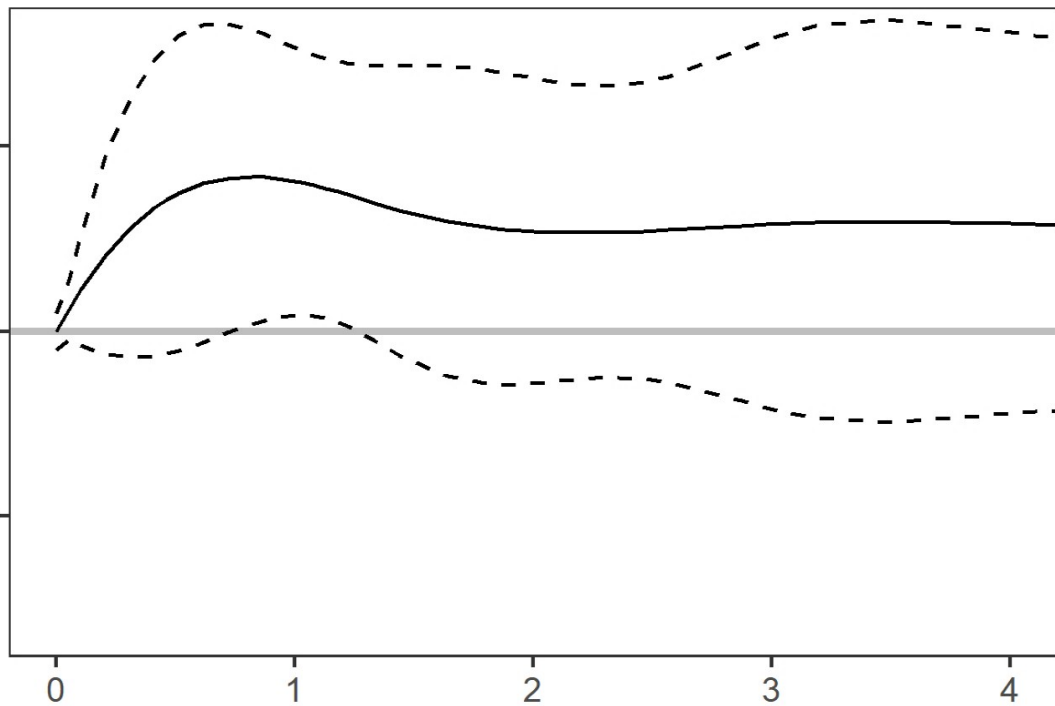

B. Metformin

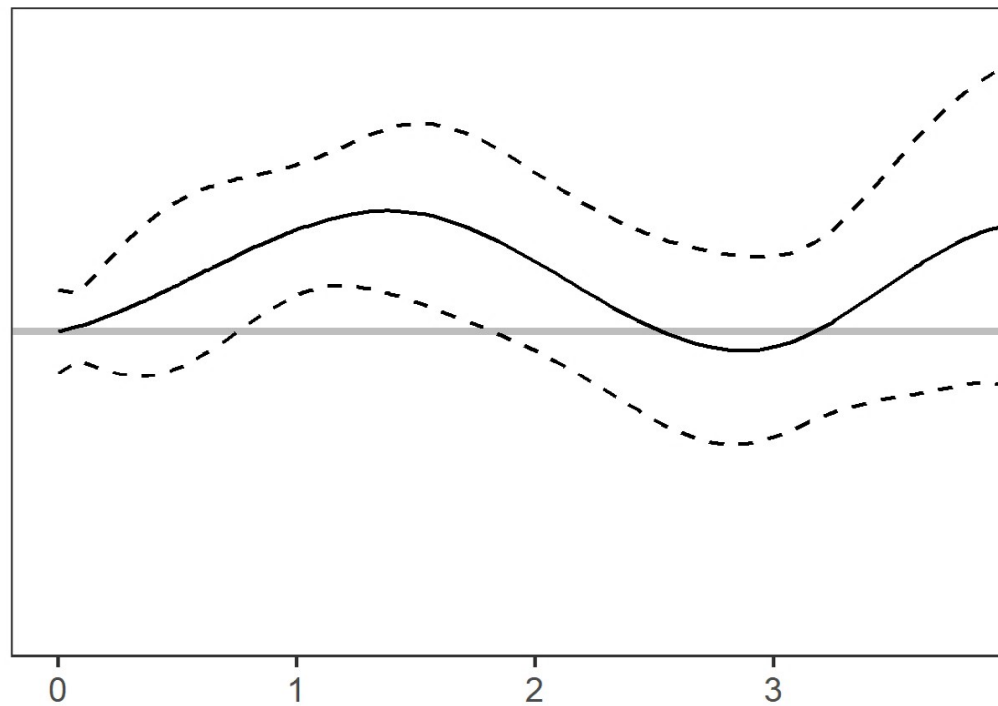

C. Other oral

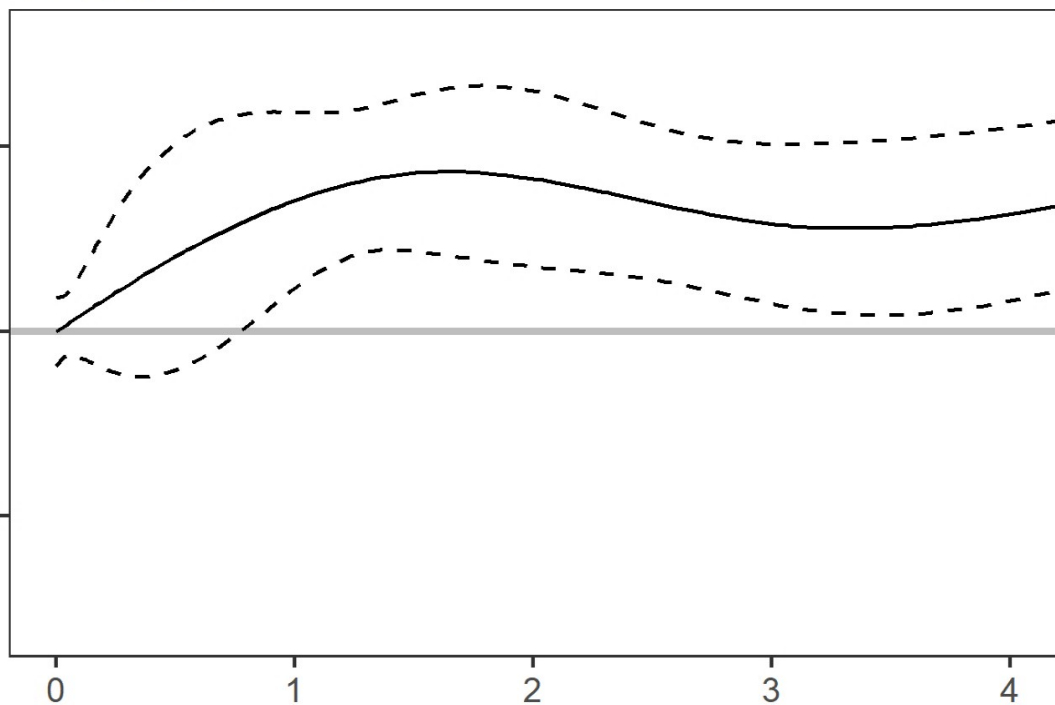

D. Statin

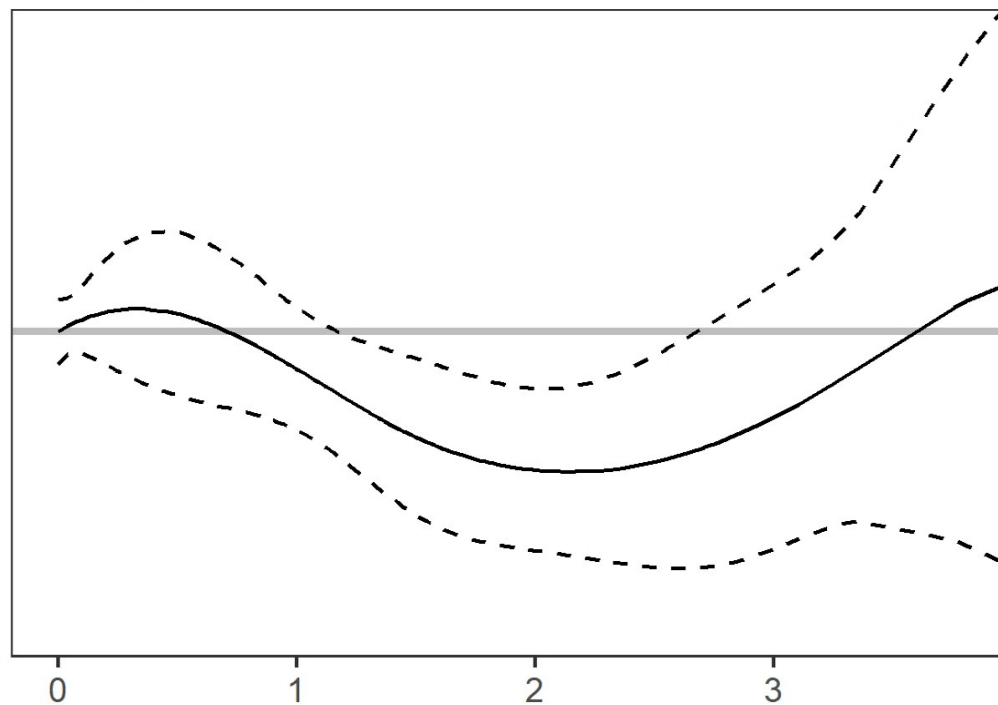

Years of DDDs
